# Supplementary material for: Self-assembly of DNA G-quadruplex nanowires: a study of the mechanism towards micrometer length
Source: Royal Society of Chemistry journal article supplement (doi:10.1039/d4nr02696a), 2024-01-01

## Supporting Information

### **Self-Assembly of DNA G-Quadruplex Nanowires: A Study of Mechanism towards Micro-meter Length**

Yiqi Fan,<sup>a,b</sup> Jiachen Li,<sup>\*c</sup> Min Jiang,<sup>a</sup> Jing Zhao,<sup>a,b</sup> Lei He,<sup>d</sup> Yong Wang<sup>c</sup> and Fangwei Shao<sup>\*a</sup>

<sup>a</sup> National Key Laboratory of Biobased Transportation Fuel Technology, Zhejiang University-University of Illinois Urbana-Champaign Institute, Zhejiang University, Haining, 314400, P.R. China

<sup>b</sup> Department of Chemistry, Zhejiang University, Hangzhou, 310000, P.R. China

<sup>c</sup> College of Life Sciences, Zhejiang University, Hangzhou, 310000, P.R. China

<sup>d</sup> State Key Laboratory of Chemical Resource Engineering, Beijing University of Chemical Technology, Beijing, 100029, P.R. China

**Table S1.** The composition of the buffer solution

| NO. | Li <sup>+</sup> (mM) | K <sup>+</sup> (mM) | Sr <sup>2+</sup> (mM) | Mg <sup>2+</sup> (mM) |
|-----|----------------------|---------------------|-----------------------|-----------------------|
| 1   | 50                   | 50                  | 10                    | /                     |
| 2   | 10                   | 10                  | /                     | /                     |
| 3   | 100                  | 10                  | /                     | /                     |
| 4   | 50                   | 50                  | /                     | /                     |
| 5   | 10                   | 100                 | /                     | /                     |
| 6   | 50                   | 50                  | /                     | 10                    |
| 7   | 10                   | 50                  | 50                    | /                     |

**Table S2.** DNA sequences of modified dG4

| DNA    | Sequences (5' to 3') |
|--------|----------------------|
| 5'P-G4 | p-GGGG*              |
| G4-3'P | GGGG-p               |
| G4T    | GGGGT                |
| TG4    | TGGGG                |
| TG4T   | TGGGGT               |

\* low case "p" mean phosphorylation at 5'- or 3'-end.

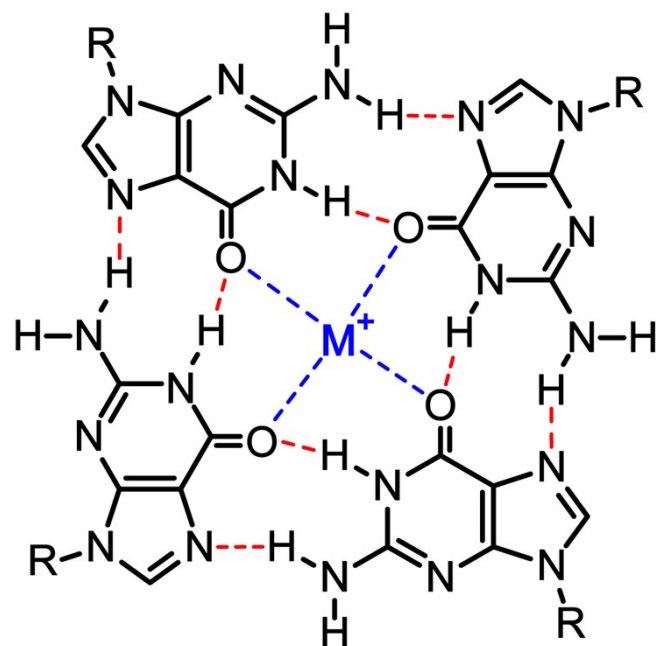

**Figure S1.** The chemical structure of a G-tetrad

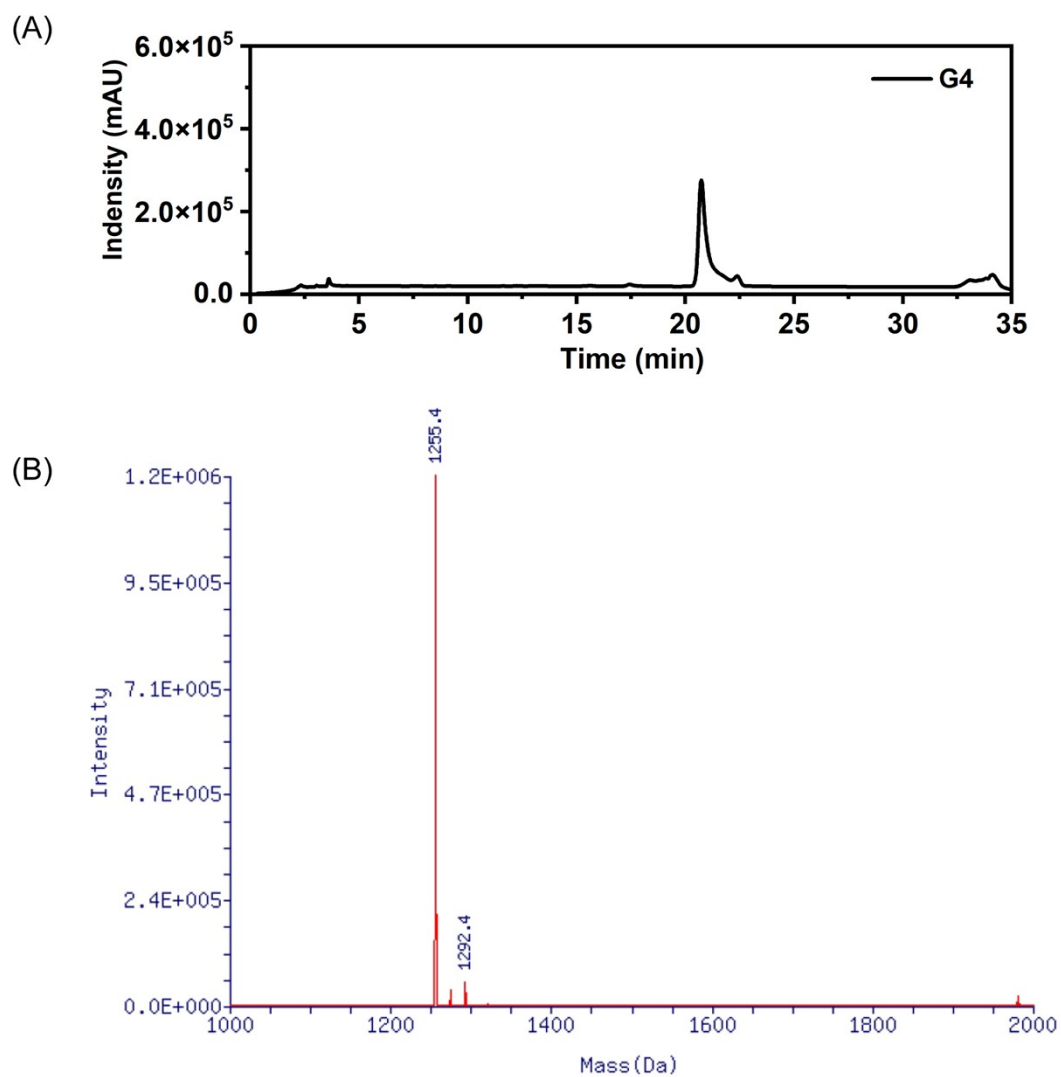

**Figure S2.** Characterization of the dG4 (5'-GGGG-3'). HPLC traces (A) and ESI-Mass spectrum (B).

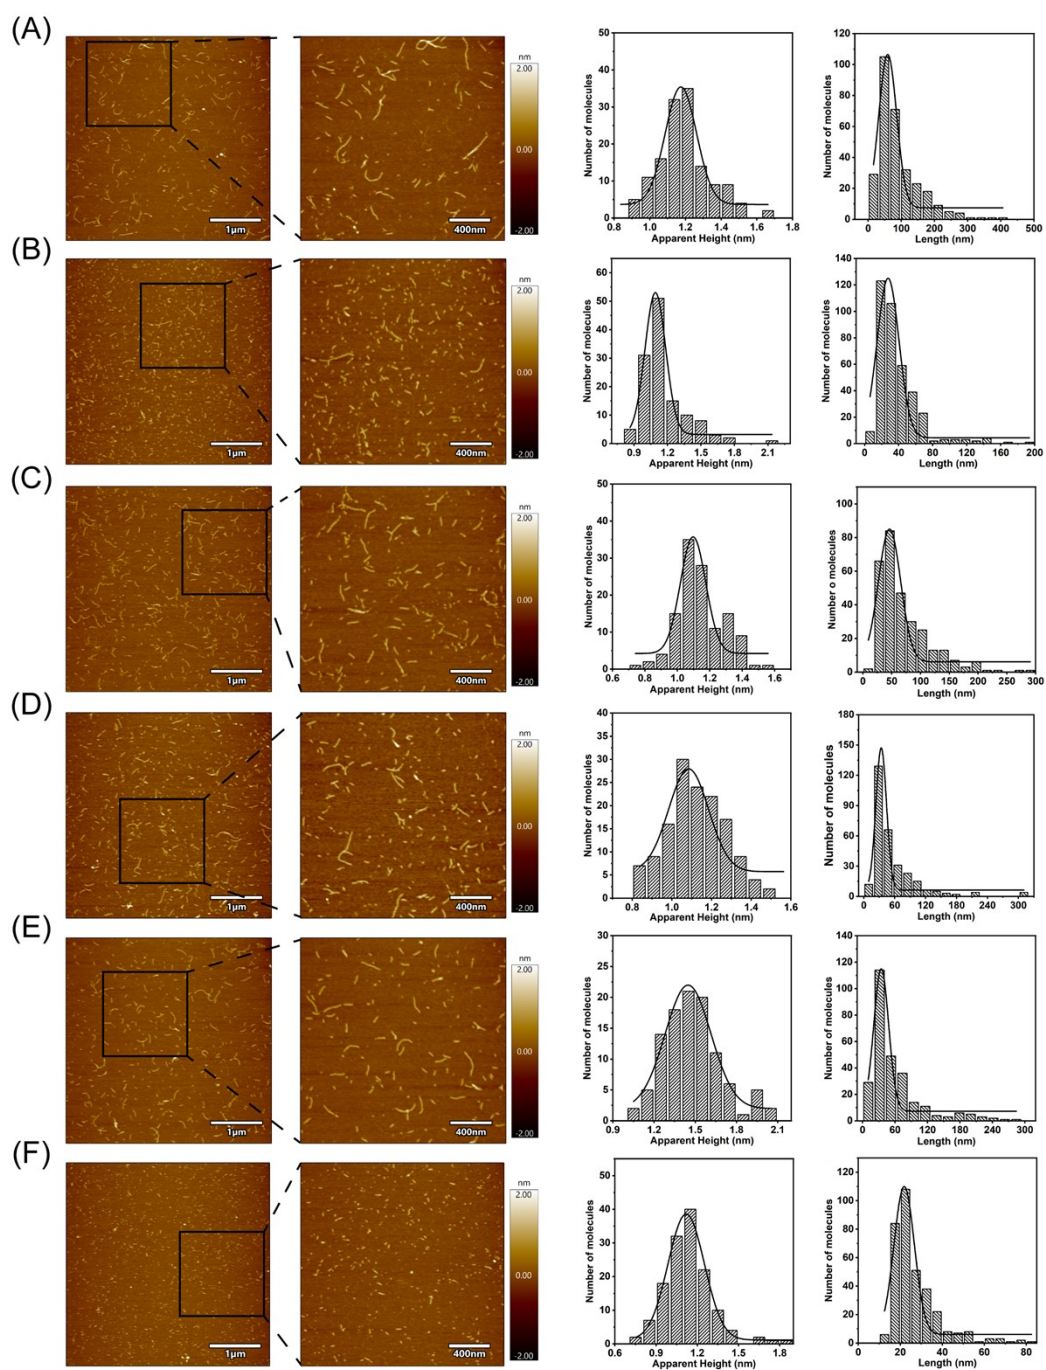

**Figure S3.** AFM images and statistical analyses for heights and lengths of corresponding G-wires grown in different protocol solutions. Measured G-wires are wG-2 (A), wG-3 (B), wG-4 (C), wG-5 (D), wG-6 (E), wG-7 (F).

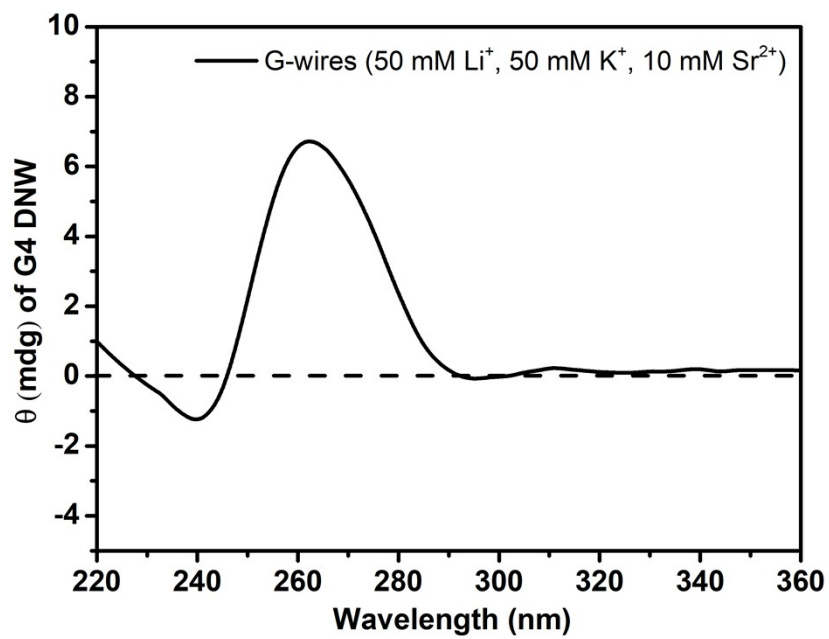

**Figure S4.** CD spectrum of G-wires in 50 mM Li<sup>+</sup>, 50 mM K<sup>+</sup>, 10 mM Sr<sup>2+</sup>.

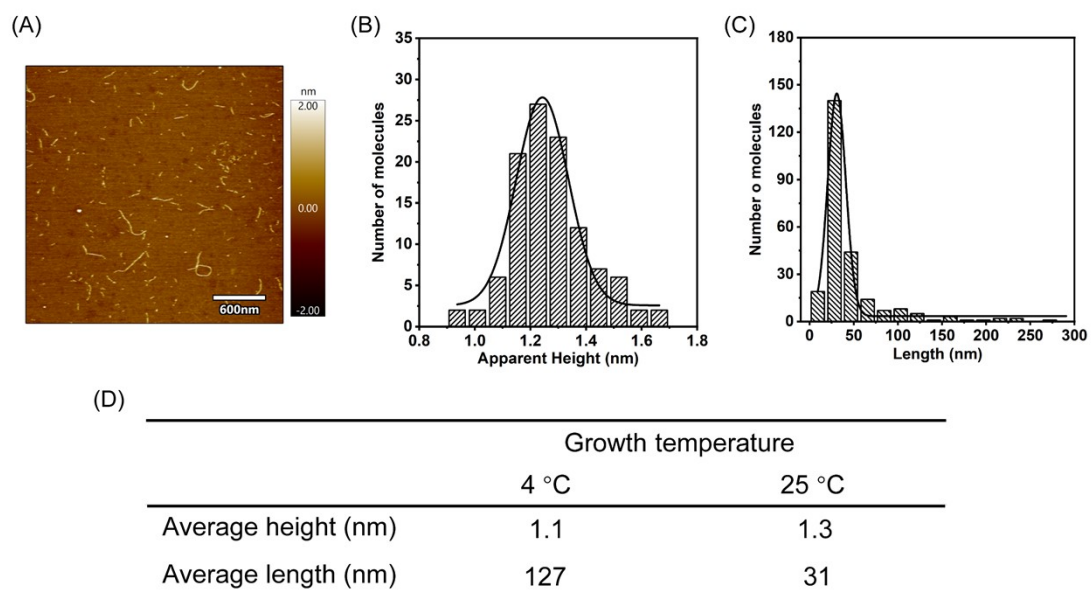

**Figure S5.** G-wires formation challenged by incubating temperature. AFM image (A) of G-wires incubated at 25 °C. Height (B) and length (C) histograms of G-wire in (A). Height and length comparison (D) of G-wires incubated at 4 °C and 25 °C.

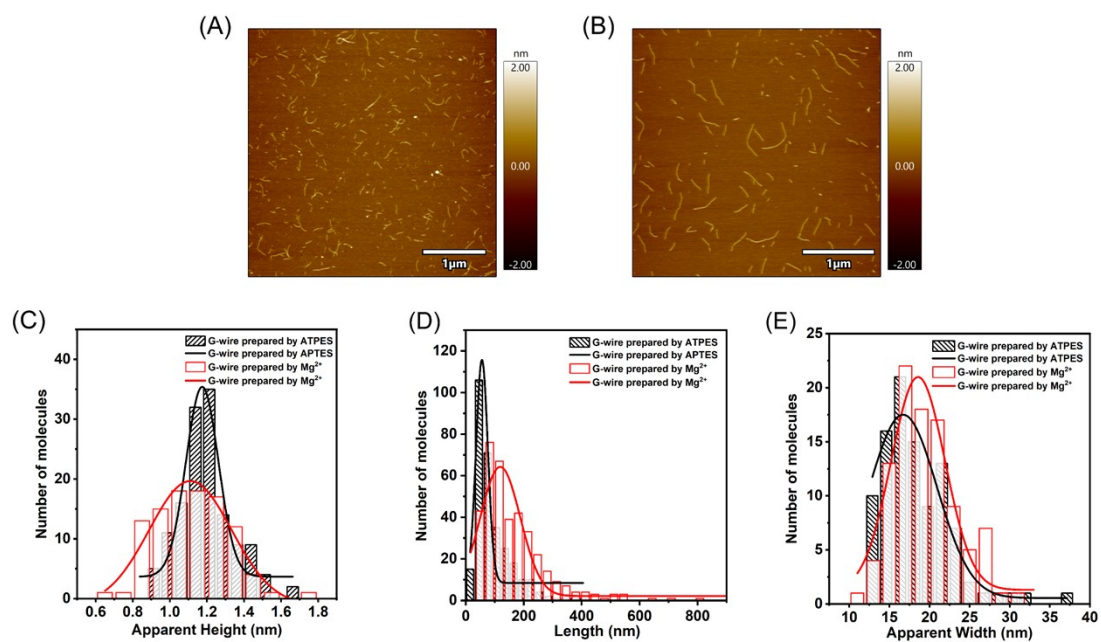

**Figure S6.** Longer G-wires formed on the mica surface. AFM images of G-wires deposited onto mica surface via APTES binding (A) and via  $Mg^{2+}$  treatment (B). Height (C), length (D) and width (E) histograms of G-wires in (A) and (B). Measured G-wire formed in 50 mM  $Li^+$ , 50 mM  $K^+$ , 10 mM  $Mg^{2+}$ .



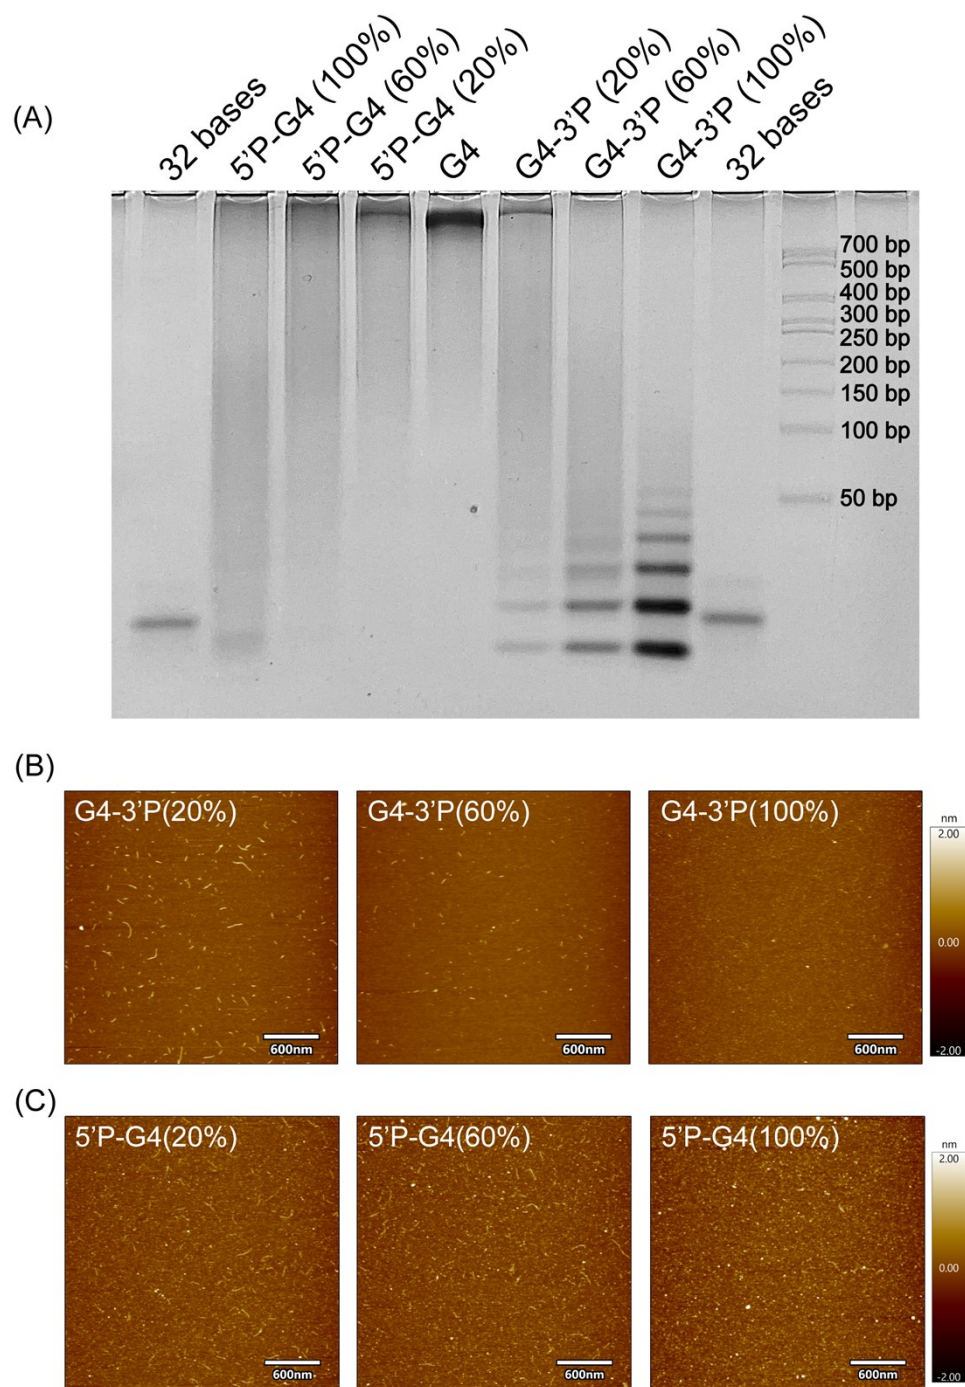

**Figure S7.** Characterization of G-wire modified by phosphate groups on dG4's end. Native PAGE analysis (A) and AFM images of G-wires self-assembled from a mixture of dG4 and 3' (B) or 5' (C) terminal phosphate groups modified dG4 at ratio of 20%, 60% and from phosphate groups modified dG4 only.

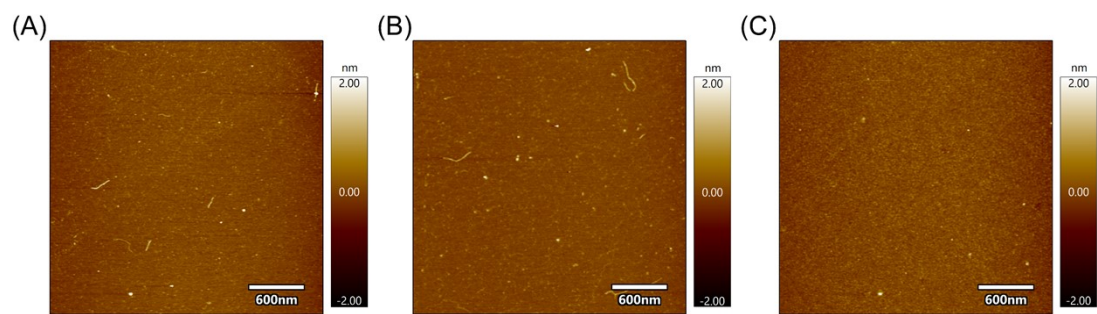

**Figure S8.** AFM images of G-wires formed by annealing dTG4 (A), dG4T (B) and dTG4T (C).

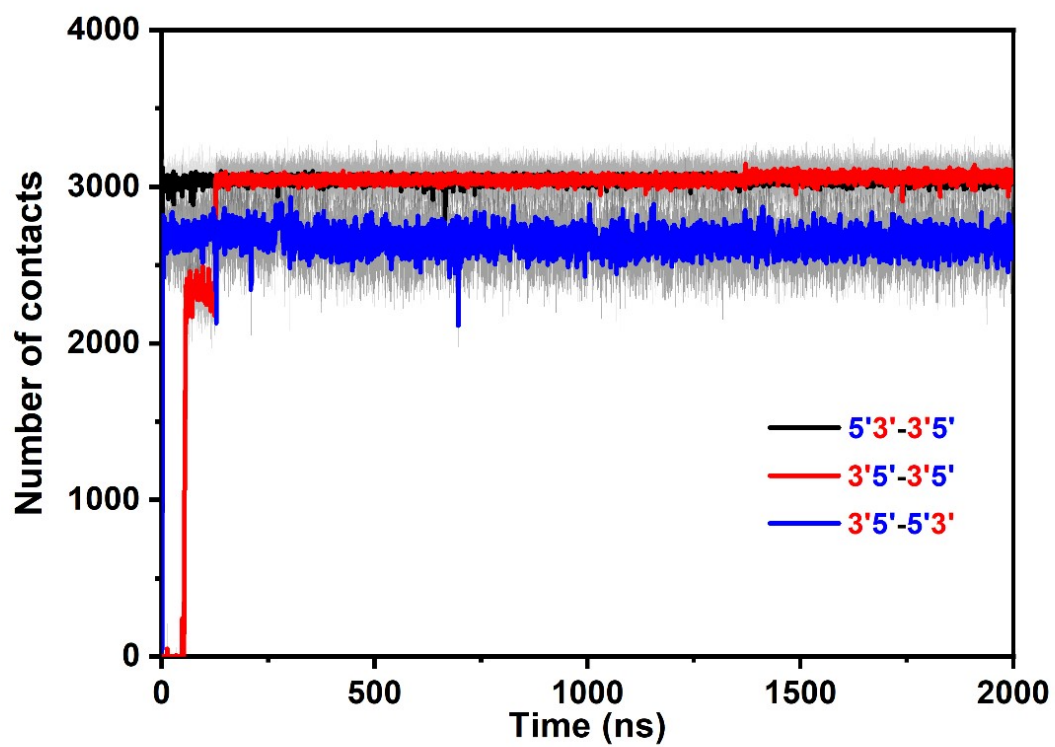

**Figure S9.** Number of contacts between dimers as a function of simulation time. The running smooth of the contacts are plotted in black, red, and blue, respectively.

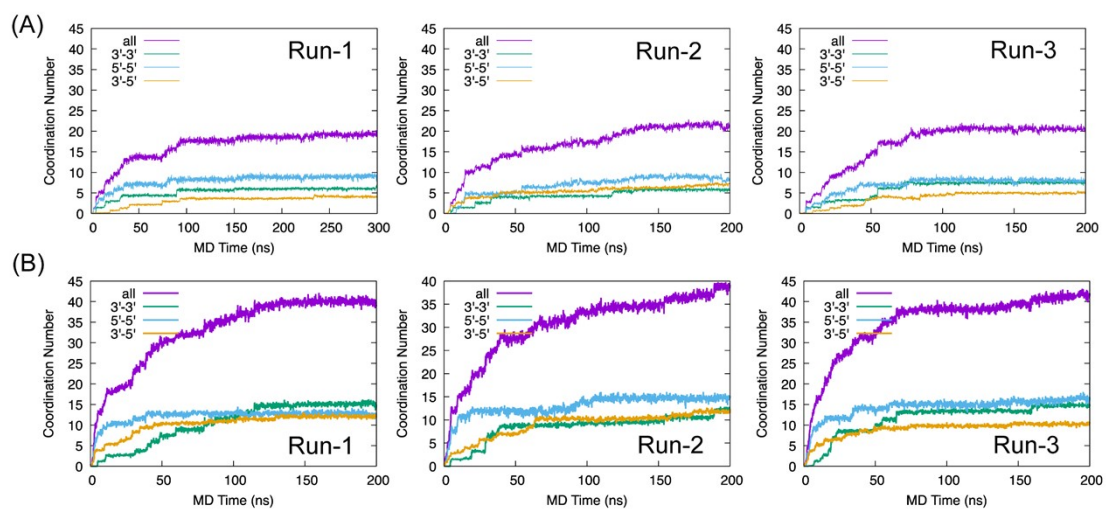

**Figure S10.** The coordination number for three different stacking modes (3'-3', 5'-5', and 3'-5') and cumulative coordination number as a function of simulation time within the KCl (A) or KCl/Sr<sub>2</sub>Cl (B) conditions.

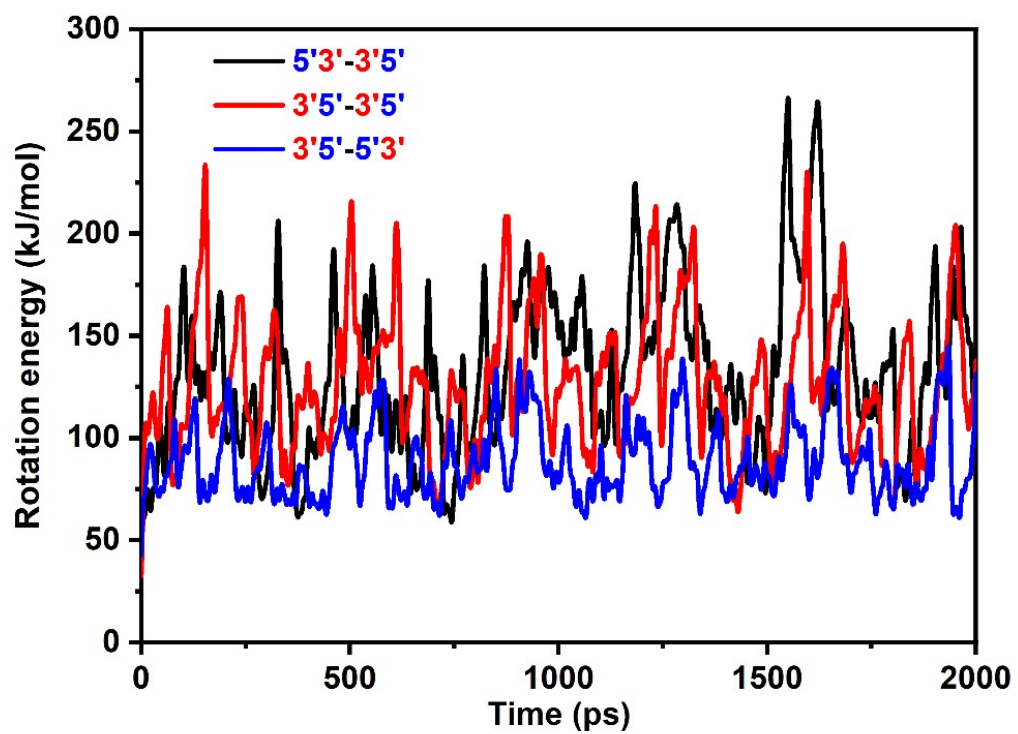

**Figure S11.** The rotational energy between two monomers within a G4 dimer as a function of simulation time.

Supplementary video (still image):

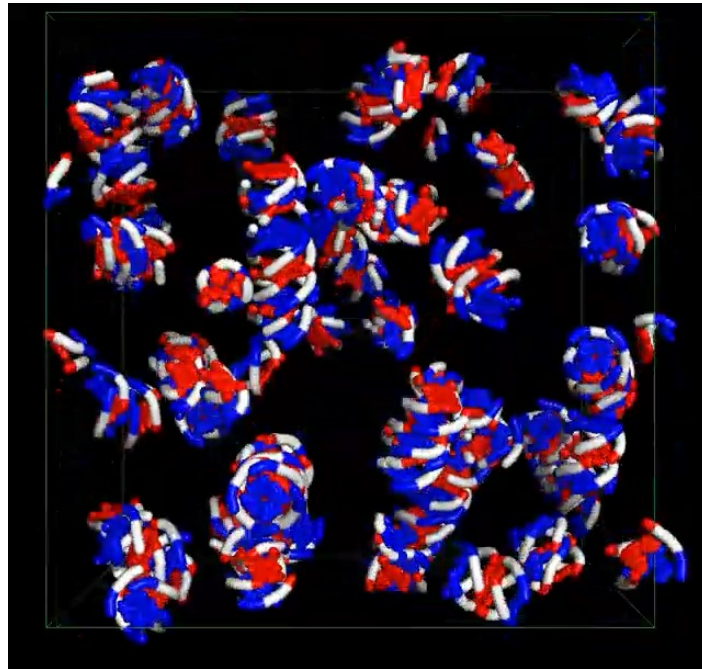

Supplement: d4nr02696a1.pdf [file d4nr02696a1.pdf]
